# Supplementary material for: Micellar transitions in catanionic ionic liquid–ibuprofen aqueous mixtures; effects of composition and dilution
Source: Royal Society of Chemistry journal article supplement (doi:10.1039/c4ra10840j), 2014-01-01
Supplement: c4ra10840j1.pdf [file c4ra10840j1.pdf]

# Micellar Transitions in Catanionic Ionic liquid - Ibuprofen Aqueous

## Mixtures; Effects of Composition and Dilution

**Reshu Sanan, Rajwinder Kaur and Rakesh Kumar Mahajan\***

Department of Chemistry, UGC-Centre for Advanced Studies

Guru Nanak Dev University, Amritsar-143005 (INDIA)

---

\*Corresponding author, Fax: +91 183 2258820

E-mail address: [rakesh\\_chem@yahoo.com](mailto:rakesh_chem@yahoo.com) (R.K.Mahajan)

**Figure S1** UV-visible spectre of aqueous  $C_{12}mimCl$  + Ibu mixtures at various mole fractions of  $C_{12}mimCl$  ( $x_{IL}$ ).

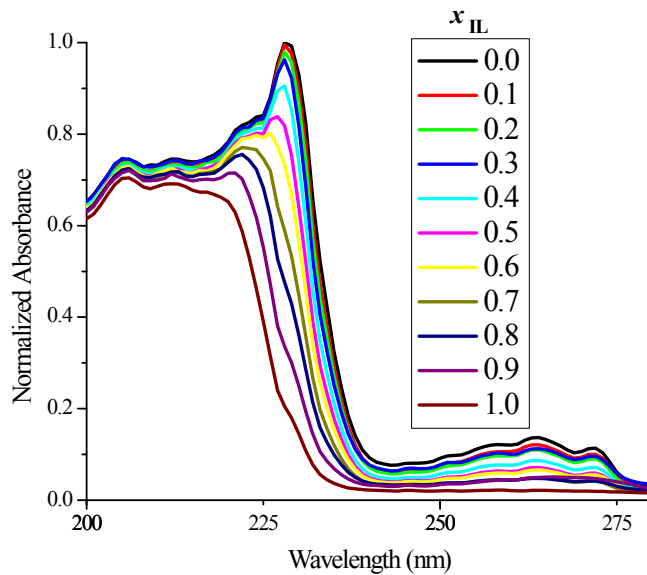

**Figure S2** Normalised fluorescence emission spectrum of Ibu in the presence of increasing amounts of  $C_{12}mimCl$ .

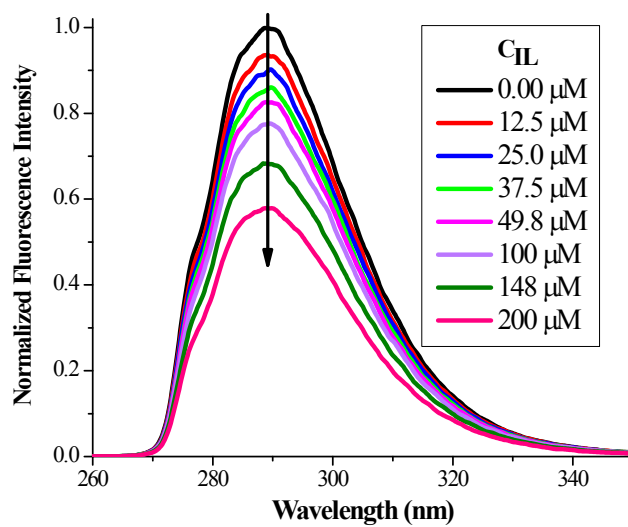

**Figure S3** (a) Stern-Volmer plots of fluorescence quenching of Ibu by  $C_n$ mimCl and (b) Binding constant determination for the  $C_n$ mim<sup>+</sup>Ibu<sup>-</sup> complexes using changes in the fluorescence emission spectra of Ibu.

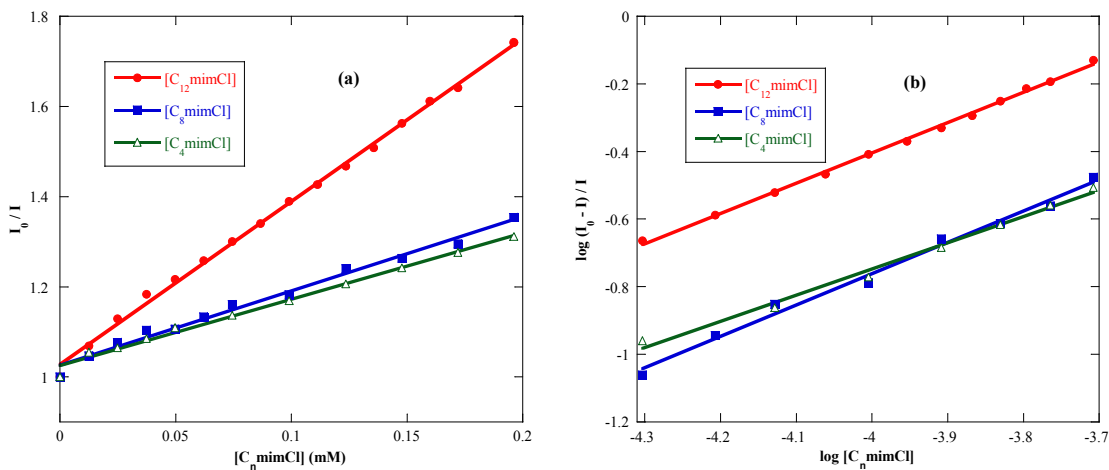

**Figure S4** Plots showing variation in the turbidity ( $\tau$ ) with total mixture concentration for anionic dominated mole fractions ( $x_{IL} = 0.1$  and  $0.2$ ) of  $C_{12}$ mimCl + Ibu aqueous mixtures.

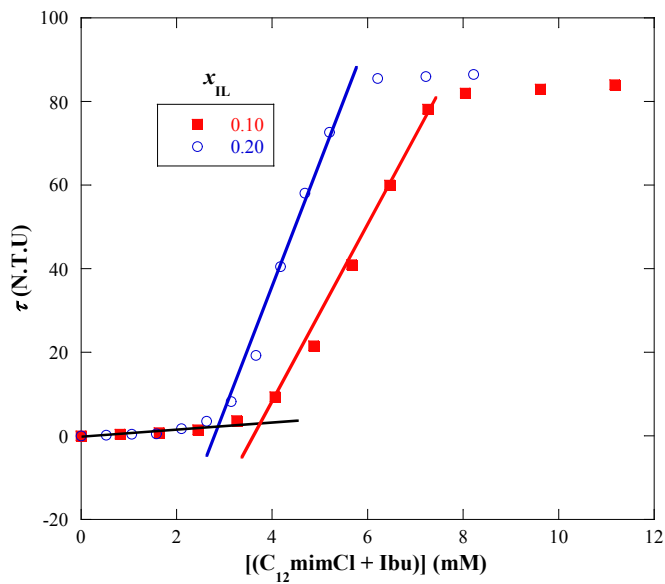

**Figure S5** Aggregate size distributions for C<sub>12</sub>mimCl and Ibu at varied concentrations. The amplitudes for 900 mM Ibu, 10 mM C<sub>12</sub>mimCl and 10mM Ibu have been shifted upwards by +20, +40 and +60 units respectively.

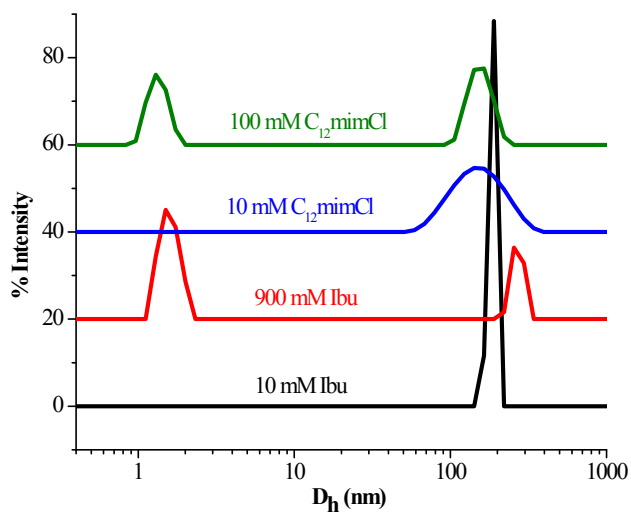

**Figure S6** <sup>1</sup>H NMR spectra for pure C<sub>12</sub>mimCl.

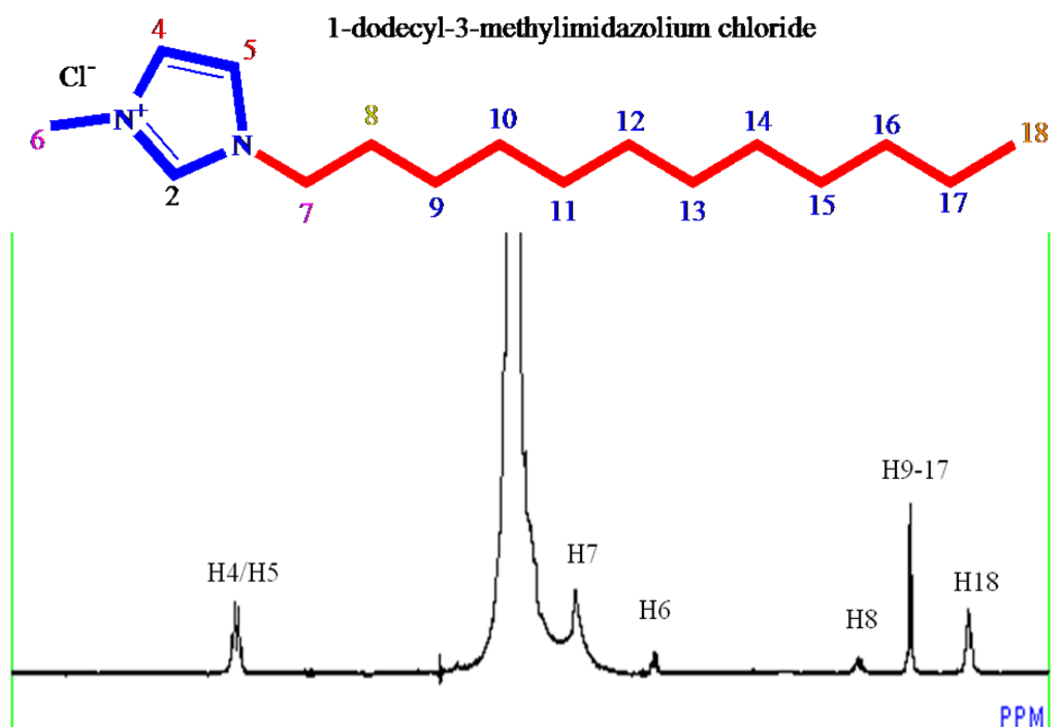

**Figure S7**  $^1\text{H}$  NMR spectra for pure Ibuprofen.

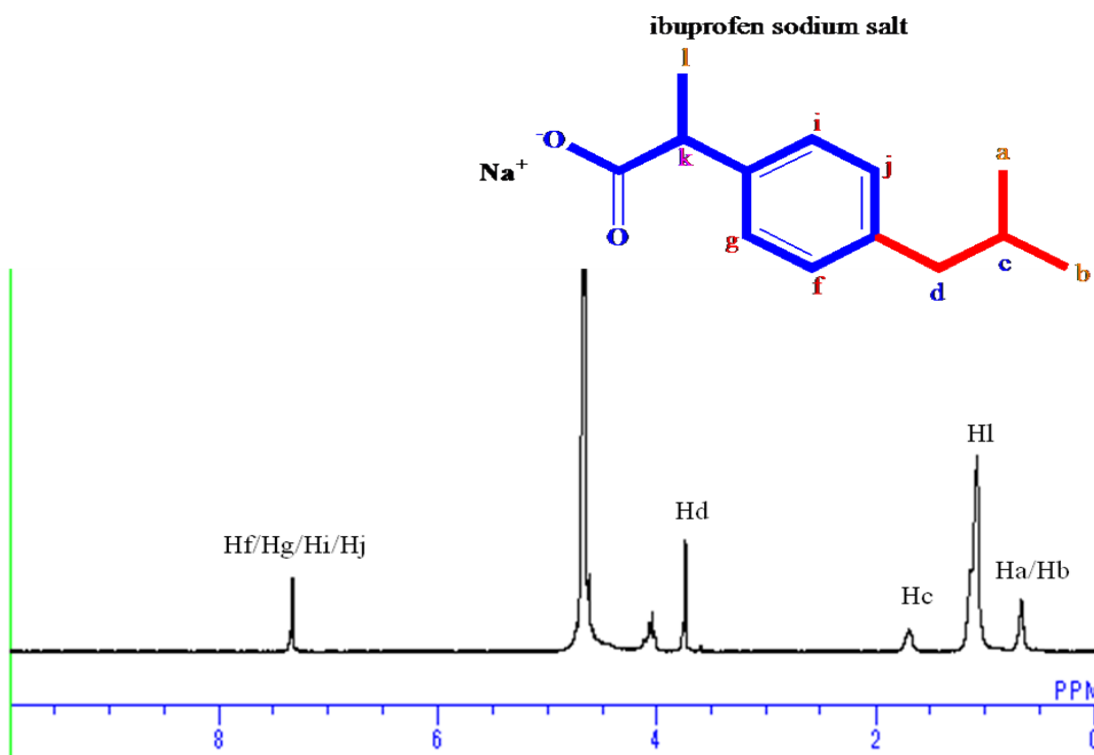

**Table S1** Effect of Dilution on the hydrodynamic diameters ( $D_h$ ) of  $\text{C}_{12}\text{mimCl}$  + Ibu aqueous mixtures for anionic dominated mole fractions ( $x_{\text{IL}} = 0.20$ ) and cationic dominated mole fractions ( $x_{\text{IL}} = 0.79$ ) at total mixture concentrations of 10mM, 50mM, 100mM and 250mM.

| $x_{\text{IL}}$ | $D_h$ (nm)   |               |              |              |
|-----------------|--------------|---------------|--------------|--------------|
|                 | 10 mM        | 50 mM         | 100 mM       | 250 mM       |
| 0.20            | 3458 ± 439.1 | 89.60 ± 27.10 | 31.41 ± 7.69 | 7.08 ± 1.66  |
|                 |              | 21.89 ± 5.59  | 11.88 ± 3.45 |              |
| 0.79            | 4.64 ± 0.84  | 2.76 ± 0.42   | 2.60 ± 0.30  | 1.95 ± 0.25  |
|                 | 149.7 ± 24.6 | 165.6 ± 25.1  | 250.6 ± 66.5 | 169.4 ± 17.9 |

**Table S2** Chemical shifts and observations for aromatic protons from  $^1\text{H}$  NMR measurements of  $\text{C}_{12}\text{mimCl}$  + Ibu mixtures at varying mole fractions ( $x_{\text{IL}}$ )

| $x_{\text{IL}}$ | $^1\text{H}$ NMR chemical shift range in $\delta$ (ppm) for aromatic protons |                        | Observations                                                                                                                                                                                                                                                                                     |
|-----------------|------------------------------------------------------------------------------|------------------------|--------------------------------------------------------------------------------------------------------------------------------------------------------------------------------------------------------------------------------------------------------------------------------------------------|
|                 | H4 / H5                                                                      | Hf, Hg, Hi, Hj         |                                                                                                                                                                                                                                                                                                  |
| 0.00            | -                                                                            | 7.318 (s)<br>7.333 (d) | (a) The aromatic protons of both the $\text{C}_{12}\text{mimCl}$ and Ibu in all the catanionic mixtures appear upfield as compared to their pure counterparts.<br><br>(b) On moving from cationic rich to anionic dominated mole fractions, a downfield shifting of all the signals is observed. |
| 0.10            | 6.737 (s)<br>6.932(s)                                                        | 6.974 (d)<br>7.146 (d) |                                                                                                                                                                                                                                                                                                  |
| 0.20            | 6.833 (s)<br>7.015 (s)                                                       | 6.966 (d)<br>7.152 (d) |                                                                                                                                                                                                                                                                                                  |
| 0.30            | 6.812 (s)<br>6.986 (s)                                                       | 6.860 (d)<br>7.065 (d) |                                                                                                                                                                                                                                                                                                  |
| 0.60            | 6.988 (s)                                                                    | 6.828 (d)<br>7.044 (d) |                                                                                                                                                                                                                                                                                                  |
| 0.70            | 6.747 (d)<br>7.028 (d)                                                       | 7.098 (s)<br>7.183 (s) |                                                                                                                                                                                                                                                                                                  |
| 0.80            | 6.779 (d)<br>7.060 (d)                                                       | 7.220 (s)<br>7.271 (s) |                                                                                                                                                                                                                                                                                                  |
| Pure IL         | 7.088 (d)<br>7.066 (d)                                                       | -                      |                                                                                                                                                                                                                                                                                                  |

**Table S3** Chemical shifts and observations for aliphatic protons from  $^1\text{H}$  NMR measurements of  $\text{C}_{12}\text{mimCl}$  + Ibu mixtures at varying mole fractions ( $x_{\text{IL}}$ )

| $x_{\text{IL}}$ | $^1\text{H}$ NMR chemical shift range in $\delta$ (ppm) for aliphatic protons |           |           |               | Observations                                                                                                                                                  |
|-----------------|-------------------------------------------------------------------------------|-----------|-----------|---------------|---------------------------------------------------------------------------------------------------------------------------------------------------------------|
|                 | H8 / Hc                                                                       | HI        | H9-17     | Ha / Hb / H18 |                                                                                                                                                               |
| 0.00            | 1.694 (s)                                                                     | 1.073 (s) | -         | 0.672 (t)     | (a) The aliphatic protons of both the $\text{C}_{12}\text{mimCl}$ and Ibu in all the cationic mixtures appear upfield as compared to their pure counterparts. |
| 0.10            | 1.586-1.743 (m)                                                               | 1.115 (s) | 1.255 (d) | 0.699 (d)     |                                                                                                                                                               |
| 0.20            | 1.589-1.722 (m)                                                               | 1.104 (s) | 1.251 (d) | 0.697 (d)     |                                                                                                                                                               |
| 0.30            | 1.492-1.625 (m)                                                               | 1.011 (s) | 1.155 (d) | 0.600 (d)     |                                                                                                                                                               |
| 0.60            | 1.476-1.587 (m)                                                               | 0.991 (s) | 1.133 (d) | 0.574 (d)     |                                                                                                                                                               |
| 0.70            | 1.515 (s)                                                                     | 1.095 (s) | 1.117 (d) | 0.550 (t)     |                                                                                                                                                               |
| 90.80           | 1.616 (s)                                                                     | 1.145 (s) | 1.170 (d) | 0.608 (t)     |                                                                                                                                                               |
| Pure IL         | 1.635-1.703 (m)                                                               | -         | 1.209 (d) | 0.697 (t)     | (b) On moving from cationic rich to anionic dominated mole fractions, a downfield shifting of all the signals is observed.                                    |
